# Supplementary material for: Distribution of Yeast Species and Risk Factors of Oral Colonization after Oral-Care Education among the Residents of Nursing Homes
Source: MDPI journal article supplement (doi:10.3390/jof8030310), 2022-03-17
Supplement: s1 [file s1]

**Table S1.** Distribution of yeast species

| Participant | No. of spp. | <i>C. albicans</i> | <i>C. glabrata</i> | <i>C. parapsilosis</i> | <i>C. tropicalis</i> | <i>C. pararugosa</i> | Others                                                                        |
|-------------|-------------|--------------------|--------------------|------------------------|----------------------|----------------------|-------------------------------------------------------------------------------|
| TCH-029-27  | 5           | 1                  | 0                  | 0                      | 0                    | 1                    | <i>C. krusei</i> , <i>C. orthopsilosis</i> , <i>Lodderomyces elongisporus</i> |
| GLS-011-144 | 5           | 1                  | 0                  | 1                      | 0                    | 0                    | <i>C. intermedia</i> , <i>C. lusitaniae</i> , <i>Pichia aff. fermentans</i>   |
| GLS-019-167 | 4           | 0                  | 0                  | 1                      | 0                    | 1                    | <i>Exophiala dermatitidis</i> , <i>Trichosporon mucoides</i>                  |
| TCH-011-118 | 4           | 1                  | 0                  | 0                      | 1                    | 1                    | <i>Saccharomyces cerevisiae</i>                                               |
| FSC-021-90  | 4           | 1                  | 0                  | 1                      | 0                    | 0                    | <i>C. guilliermondii</i> , <i>C. orthopsilosis</i>                            |
| HWA-012-21  | 4           | 1                  | 0                  | 1                      | 0                    | 1                    | <i>C. intermedia</i>                                                          |
| HWA-017-63  | 4           | 1                  | 1                  | 0                      | 0                    | 0                    | <i>C. metapsilosis</i> , <i>Magnusiomyces capitatus</i>                       |
| FSC-049-93  | 4           | 1                  | 1                  | 0                      | 1                    | 0                    | <i>Saccharomyces cerevisiae</i>                                               |
| GFC-014-154 | 4           | 1                  | 1                  | 0                      | 1                    | 0                    | <i>C. orthopsilosis</i>                                                       |
| FSC-001-33  | 4           | 1                  | 1                  | 1                      | 0                    | 0                    | <i>Candida guilliermondii</i>                                                 |
| HWA-015-127 | 3           | 0                  | 0                  | 0                      | 0                    | 0                    | <i>C. intermedia</i> ,                                                        |
| GLS-017-136 | 3           | 0                  | 0                  | 1                      | 0                    | 1                    | <i>Trichosporon asahii</i>                                                    |
| YEOo-002-89 | 3           | 1                  | 0                  | 0                      | 0                    | 0                    | <i>C. guilliermondii</i> , <i>Magnusiomyces capitatus</i>                     |
| FAM-007-168 | 3           | 1                  | 0                  | 1                      | 0                    | 0                    | <i>C. norvegensis</i>                                                         |
| FSC-041-126 | 3           | 1                  | 0                  | 1                      | 0                    | 0                    | <i>Saccharomyces cerevisiae</i>                                               |
| FSC-008-46  | 3           | 1                  | 0                  | 1                      | 0                    | 0                    | <i>C. fermentati</i>                                                          |
| FSC-004-42  | 3           | 1                  | 0                  | 1                      | 0                    | 0                    | <i>C. guilliermondii</i>                                                      |
| TCH-013-104 | 3           | 1                  | 0                  | 1                      | 0                    | 0                    | <i>Trichosporon asahii</i>                                                    |
| FAM-001-73  | 3           | 1                  | 0                  | 1                      | 0                    | 1                    |                                                                               |

|              |   |   |   |   |   |   |                                 |
|--------------|---|---|---|---|---|---|---------------------------------|
| WES-001-2    | 3 | 1 | 0 | 1 | 1 | 0 |                                 |
| FSC5-039-114 | 3 | 1 | 1 | 0 | 0 | 0 | <i>Trichosporon asahii</i>      |
| FSC-029-68   | 3 | 1 | 1 | 0 | 0 | 0 | <i>Rhodotorula minuta</i>       |
| GLS5-010-66  | 3 | 1 | 1 | 0 | 0 | 0 | <i>Candida ethanolica</i>       |
| FAM-011-34   | 3 | 1 | 1 | 0 | 1 | 0 |                                 |
| FSC5-025-11  | 3 | 1 | 1 | 0 | 1 | 0 |                                 |
| FSC5-016-50  | 3 | 1 | 1 | 0 | 1 | 0 |                                 |
| GLS-008-15   | 3 | 1 | 1 | 0 | 1 | 0 |                                 |
| GLS-007-67   | 3 | 1 | 1 | 0 | 1 | 0 |                                 |
| HWA-002-13   | 3 | 1 | 1 | 0 | 1 | 0 |                                 |
| TCH-010-78   | 3 | 1 | 1 | 0 | 1 | 0 |                                 |
| WES-013-96   | 3 | 1 | 1 | 0 | 1 | 0 |                                 |
| WES-018-40   | 3 | 1 | 1 | 0 | 1 | 0 |                                 |
| WES-020-75   | 3 | 1 | 1 | 0 | 1 | 0 |                                 |
| YEO5-006-108 | 3 | 1 | 1 | 0 | 1 | 0 |                                 |
| TCH-014-117  | 3 | 1 | 1 | 1 | 0 | 0 |                                 |
| HWA-007-56   | 2 | 0 | 1 | 0 | 0 | 0 | <i>Candida dubliniensis</i>     |
| TCH5-016-115 | 2 | 0 | 1 | 0 | 0 | 0 | <i>Candida metapsilosis</i>     |
| FSC-042-155  | 2 | 1 | 0 | 0 | 0 | 0 | <i>Saccharomyces cerevisiae</i> |
| HOP-008-148  | 2 | 1 | 0 | 0 | 0 | 0 | <i>Trichosporon asahii</i>      |
| HWA-014-138  | 2 | 1 | 0 | 0 | 0 | 0 | <i>Exophiala dermatitidis</i>   |
| HWA-001-157  | 2 | 1 | 0 | 0 | 0 | 0 | <i>Candida guilliermondii</i>   |
| YEO-008-35   | 2 | 1 | 0 | 0 | 0 | 0 | <i>Candida metapsilosis</i>     |
| GFC-015-163  | 2 | 1 | 0 | 0 | 1 | 0 |                                 |
| HOP-001-101  | 2 | 1 | 0 | 0 | 1 | 0 |                                 |
| TCH5-043-113 | 2 | 1 | 0 | 0 | 1 | 0 |                                 |
| GLS-014-110  | 2 | 1 | 0 | 1 | 0 | 0 |                                 |

|             |   |   |   |   |   |   |                             |
|-------------|---|---|---|---|---|---|-----------------------------|
| TCH-021-6   | 2 | 1 | 0 | 1 | 0 | 0 |                             |
| FSC-026-76  | 2 | 1 | 1 | 0 | 0 | 0 |                             |
| FSC5-023-38 | 2 | 1 | 1 | 0 | 0 | 0 |                             |
| FSC-033-137 | 2 | 1 | 1 | 0 | 0 | 0 |                             |
| FSC-018-57  | 2 | 1 | 1 | 0 | 0 | 0 |                             |
| GLS-003-102 | 2 | 1 | 1 | 0 | 0 | 0 |                             |
| GLS-015-24  | 2 | 1 | 1 | 0 | 0 | 0 |                             |
| GLS-018-16  | 2 | 1 | 1 | 0 | 0 | 0 |                             |
| GLS-003-128 | 2 | 1 | 1 | 0 | 0 | 0 |                             |
| HOP-003-7   | 2 | 1 | 1 | 0 | 0 | 0 |                             |
| HOP-005-111 | 2 | 1 | 1 | 0 | 0 | 0 |                             |
| HOP-006-29  | 2 | 1 | 1 | 0 | 0 | 0 |                             |
| HOP-010-121 | 2 | 1 | 1 | 0 | 0 | 0 |                             |
| HWA-020-39  | 2 | 1 | 1 | 0 | 0 | 0 |                             |
| HWA-009-53  | 2 | 1 | 1 | 0 | 0 | 0 |                             |
| HWA-006-109 | 2 | 1 | 1 | 0 | 0 | 0 |                             |
| TCH-037-150 | 2 | 1 | 1 | 0 | 0 | 0 |                             |
| TCH5-009-25 | 2 | 1 | 1 | 0 | 0 | 0 |                             |
| TCH-024-62  | 2 | 1 | 1 | 0 | 0 | 0 |                             |
| WES-016-92  | 2 | 1 | 1 | 0 | 0 | 0 |                             |
| WES-019-20  | 2 | 1 | 1 | 0 | 0 | 0 |                             |
| TCH-012-149 | 1 | 0 | 0 | 0 | 0 | 0 | <i>C. utilis</i>            |
| WES-040-44  | 1 | 0 | 0 | 0 | 0 | 0 | <i>Candida dubliniensis</i> |
| YEO-009-141 | 1 | 0 | 0 | 0 | 0 | 0 | <i>Candida dubliniensis</i> |
| YEO-003-52  | 1 | 0 | 0 | 0 | 0 | 0 | <i>Candida dubliniensis</i> |
| HWA-037-123 | 1 | 0 | 0 | 0 | 0 | 1 |                             |
| GFC-022-98  | 1 | 0 | 0 | 1 | 0 | 0 |                             |

---

|              |   |   |   |   |   |   |
|--------------|---|---|---|---|---|---|
| GFC-004-94   | 1 | 0 | 0 | 1 | 0 | 0 |
| HOP-007-145  | 1 | 0 | 0 | 1 | 0 | 0 |
| TCH-006-4    | 1 | 0 | 0 | 1 | 0 | 0 |
| FAM-006-146  | 1 | 1 | 0 | 0 | 0 | 0 |
| FAM-004-69   | 1 | 1 | 0 | 0 | 0 | 0 |
| FAM-002-125  | 1 | 1 | 0 | 0 | 0 | 0 |
| FAM-008-70   | 1 | 1 | 0 | 0 | 0 | 0 |
| FSC-031-14   | 1 | 1 | 0 | 0 | 0 | 0 |
| FSC-030-91   | 1 | 1 | 0 | 0 | 0 | 0 |
| FSC-027-51   | 1 | 1 | 0 | 0 | 0 | 0 |
| FSC-019-12   | 1 | 1 | 0 | 0 | 0 | 0 |
| FSC-002-3    | 1 | 1 | 0 | 0 | 0 | 0 |
| FSC-012-41   | 1 | 1 | 0 | 0 | 0 | 0 |
| FSC-032-105  | 1 | 1 | 0 | 0 | 0 | 0 |
| FSC-007-122  | 1 | 1 | 0 | 0 | 0 | 0 |
| FSC-044-82   | 1 | 1 | 0 | 0 | 0 | 0 |
| FSC-014-18   | 1 | 1 | 0 | 0 | 0 | 0 |
| FSC-013-71   | 1 | 1 | 0 | 0 | 0 | 0 |
| GFC5-002-95  | 1 | 1 | 0 | 0 | 0 | 0 |
| GFC-017-119  | 1 | 1 | 0 | 0 | 0 | 0 |
| GLS5-004-134 | 1 | 1 | 0 | 0 | 0 | 0 |
| GLS-006-81   | 1 | 1 | 0 | 0 | 0 | 0 |
| GLS5-012-165 | 1 | 1 | 0 | 0 | 0 | 0 |
| GLS-007-22   | 1 | 1 | 0 | 0 | 0 | 0 |
| GLS-001-97   | 1 | 1 | 0 | 0 | 0 | 0 |
| GLS-002-99   | 1 | 1 | 0 | 0 | 0 | 0 |
| HWA-013-156  | 1 | 1 | 0 | 0 | 0 | 0 |

---



Table S2. Distribution of species causing multiple species colonization

| Total spp No | No. residents | <i>C. albicans</i> | <i>C. glabrata</i> | <i>C. parapsilosis</i> | <i>C. tropicalis</i> | <i>C. pararugosa</i> | Others                                                                           |
|--------------|---------------|--------------------|--------------------|------------------------|----------------------|----------------------|----------------------------------------------------------------------------------|
| 5            | 1             | 1                  | 0                  | 1                      | 0                    | 0                    | <i>C. intermedia</i> , <i>C. lusitaniae</i> ,<br><i>Pichia aff. fermentans</i>   |
| 5            | 1             | 1                  | 0                  | 0                      | 0                    | 1                    | <i>C. krusei</i> , <i>C. orthopsilosis</i> ,<br><i>Lodderomyces elongisporus</i> |
| 4            | 1             | 1                  | 1                  | 1                      | 0                    | 0                    | <i>C. guilliermondii</i>                                                         |
| 4            | 1             | 1                  | 1                  | 0                      | 1                    | 0                    | <i>Saccharomyces cerevisiae</i>                                                  |
| 4            | 1             | 1                  | 1                  | 0                      | 1                    | 0                    | <i>C. orthopsilosis</i>                                                          |
| 4            | 1             | 1                  | 1                  | 0                      | 0                    | 0                    | <i>C. metapsilosis</i> , <i>Magnusiomyces capitatus</i>                          |
| 4            | 1             | 1                  | 0                  | 1                      | 0                    | 1                    | <i>C. intermedia</i>                                                             |
| 4            | 1             | 1                  | 0                  | 1                      | 0                    | 0                    | <i>C. guilliermondii</i> , <i>C. orthopsilosis</i>                               |
| 4            | 1             | 1                  | 0                  | 0                      | 1                    | 1                    | <i>Saccharomyces cerevisiae</i>                                                  |
| 4            | 1             | 0                  | 0                  | 1                      | 0                    | 1                    | <i>Exophiala dermatitidis</i> ,<br><i>Trichosporon mucoides</i>                  |
| 3            | 11            | 1                  | 1                  | 0                      | 1                    | 0                    |                                                                                  |
| 3            | 1             | 1                  | 1                  | 1                      | 0                    | 0                    |                                                                                  |
| 3            | 1             | 1                  | 1                  | 0                      | 0                    | 0                    | <i>Trichosporon asahii</i>                                                       |
| 3            | 1             | 1                  | 1                  | 0                      | 0                    | 0                    | <i>Rhodotorula minuta</i>                                                        |
| 3            | 1             | 1                  | 1                  | 0                      | 0                    | 0                    | <i>C. ethanolica</i>                                                             |
| 3            | 1             | 1                  | 0                  | 1                      | 1                    | 0                    |                                                                                  |
| 3            | 1             | 1                  | 0                  | 1                      | 0                    | 1                    |                                                                                  |

|   |    |   |   |   |   |   |                                                              |
|---|----|---|---|---|---|---|--------------------------------------------------------------|
| 3 | 1  | 1 | 0 | 1 | 0 | 0 | <i>C. norvegensis</i>                                        |
| 3 | 1  | 1 | 0 | 1 | 0 | 0 | <i>Saccharomyces cerevisiae</i>                              |
| 3 | 1  | 1 | 0 | 1 | 0 | 0 | <i>C. fermentati</i>                                         |
| 3 | 1  | 1 | 0 | 1 | 0 | 0 | <i>C. guilliermondii</i>                                     |
| 3 | 1  | 1 | 0 | 1 | 0 | 0 | <i>Trichosporon asahii</i>                                   |
| 3 | 1  | 1 | 0 | 0 | 0 | 0 | <i>C. guilliermondii</i> ,<br><i>Magnusiomyces capitatus</i> |
| 3 | 1  | 0 | 0 | 1 | 0 | 1 | <i>Trichosporon asahii</i>                                   |
| 3 | 1  | 0 | 0 | 0 | 0 | 0 | <i>C. intermedia</i> ,                                       |
| 2 | 20 | 1 | 1 | 0 | 0 | 0 |                                                              |
| 2 | 3  | 1 | 0 | 0 | 1 | 0 |                                                              |
| 2 | 2  | 1 | 0 | 1 | 0 | 0 |                                                              |
| 2 | 1  | 1 | 0 | 0 | 0 | 0 | <i>Saccharomyces cerevisiae</i>                              |
| 2 | 1  | 1 | 0 | 0 | 0 | 0 | <i>Trichosporon asahii</i>                                   |
| 2 | 1  | 1 | 0 | 0 | 0 | 0 | <i>Exophiala dermatitidis</i>                                |
| 2 | 1  | 1 | 0 | 0 | 0 | 0 | <i>C. guilliermondii</i>                                     |
| 2 | 1  | 1 | 0 | 0 | 0 | 0 | <i>C. metapsilosis</i>                                       |
| 2 | 1  | 0 | 1 | 0 | 0 | 0 | <i>C. dubliniensis</i>                                       |
| 2 | 1  | 0 | 1 | 0 | 0 | 0 | <i>C. metapsilosis</i>                                       |

No, number.
